# Supplementary material for: Computation of geographic variables for air pollution prediction models in South Korea
Source: PubMed Central journal article supplement (PMC4662093; doi:10.5620/eht.e2015010), 2015-10-23
Supplement: eht-30-e2015010-supple1.pdf [file eht-30-e2015010-supple1.pdf]

**Table S1.** Coordinate systems used in different data sources

| Data source | Geographical coordinate system | Projection | Origin    |          | Added values to origin |          | Scale factor |
|-------------|--------------------------------|------------|-----------|----------|------------------------|----------|--------------|
|             |                                |            | Longitude | Latitude | Easting                | Northing |              |
| KTDB        | Bessel 1841                    | TM         | 128       | 38       | 400000                 | 600000   | 0.9999       |
| SGIS        | Bessel 1841                    | TM         | 128.00289 | 38       | 200000                 | 500000   | 1            |
| IIS         | WGS 1984                       | -          | -         | -        | -                      | -        | -            |
| EGIS        | ITRF 2000                      | TM         | 127       | 38       | 200000                 | 500000   | 1            |

KTDB, Korean Transport Database; SGIS, Statistical Geographic Information Service; IIS, Institute of Industrial Science, University of Tokyo; EGIS, Environmental Geographical Information Service; WGS, World Geodetic System; ITRF, International Terrestrial Reference System; TM, Transverse Mercator
