# Supplementary material for: Computation of geographic variables for air pollution prediction models in South Korea
Source: PubMed Central journal article supplement (PMC4662093; doi:10.5620/eht.e2015010), 2015-10-23
Supplement: eht-30-e2015010-supple2.pdf [file eht-30-e2015010-supple2.pdf]

**Table S2.** Minimum widths of roads depending on type of road, speed limit, and type of area in the Administrative Rule on the Structure and Installation of Road

| Type of road | Speed limit (km/h) | Type of area |       |
|--------------|--------------------|--------------|-------|
|              |                    | Non-urban    | Urban |
| Highway      |                    | 3.50         | 3.50  |
| Non-highway  | ≥80                | 3.50         | 3.25  |
|              | ≥70                | 3.25         | 3.00  |
|              | ≥60                | 3.25         | 3.00  |
|              | <60                | 3.00         | 3.00  |
